# Supplementary material for: Coarse-Grained Modelling and Temperature Effect on the Morphology of PS-b-PI Copolymer
Source: MDPI journal article supplement (doi:10.3390/polym11061008), 2019-06-06
Supplement: s1 [file s1]

# Supplementary Materials

## Coarse-Grained Modelling and Temperature Effect on the Morphology of PS-*b*-PI Copolymer

Natthiti Chiangraeng <sup>1,2</sup>, Vannajan Sanghiran Lee <sup>3</sup> and Piyarat Nimmanpipug <sup>1,\*</sup>

<sup>1</sup> Department of Chemistry, Faculty of Science and Center of Excellence for Innovation in Analytical Science and Technology, Chiang Mai University, Chiang Mai 50200, Thailand; natthiti.c@gmail.com

<sup>2</sup> Doctor of Philosophy Program in Chemistry, Faculty of Science, Chiang Mai University, Chiang Mai 50200, Thailand

<sup>3</sup> Department of Chemistry, Faculty of Science, University of Malaya, Kuala Lumpur 50603, Malaysia; vannajan@um.edu.my

\* Correspondence: piyarat.n@cmu.ac.th; Tel.: +66-5394-3344; Fax: +66-5389-2277

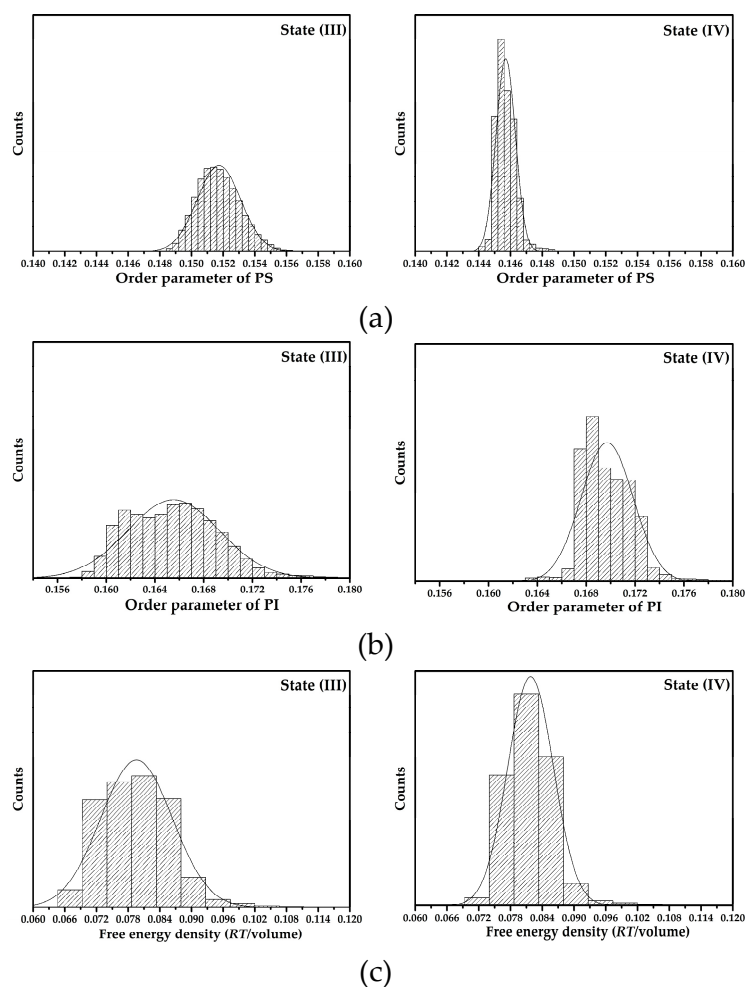

**Figure S1.** Distribution of order parameter for (a) PS, (b) PI, and (c) free energy density at 393 K.

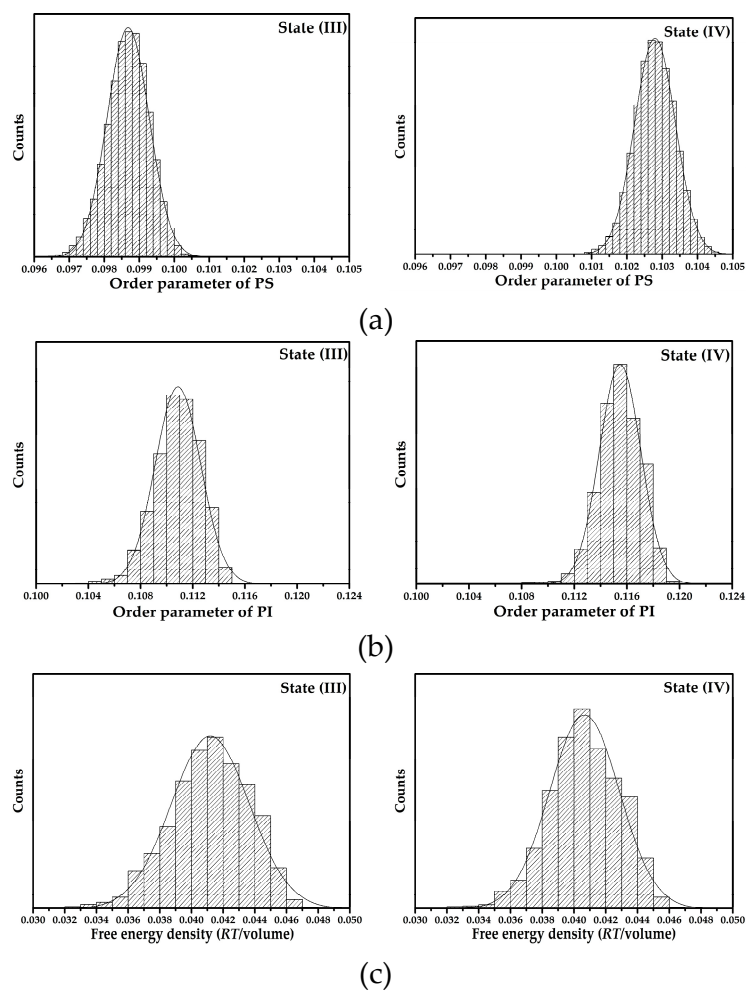

**Figure S2.** Distribution of order parameter for (a) PS, (b) PI, and (c) free energy density at 533 K.
